# Supplementary material for: Transcriptome and MiRNAomics Analyses Identify Genes Associated with Cytoplasmic Male Sterility in Cotton (Gossypium hirsutum L.)
Source: MDPI journal article supplement (doi:10.3390/ijms22094684), 2021-04-28
Supplement: s1 [file s1]

**Supplementary Table S1**

Statistics of the miRNA and mRNA sequencing data of J4A and J4B

|        | Type             | J4A         | J4B         |
|--------|------------------|-------------|-------------|
| mRNAs  | Raw reads        | 434,942,372 | 441,384,782 |
|        | Clean reads      | 430,439,840 | 436,986,028 |
|        | Clean read %     | 98.96       | 99          |
|        | mRNAs            |             | 62,167      |
| miRNAs | Raw reads        | 69,327,639  | 80,524,070  |
|        | Clean reads      | 49,185,274  | 64,452,578  |
|        | Unique reads     | 12,899,113  | 20,561,439  |
|        | Conserved miRNAs | 62,956      | 274,335     |
|        | Novel miRNAs     | 9,875       | 14,082      |

**Supplementary Table S2**

Detailed information on the top 16 up-regulated and 10 down-regulated miRNAs

| ID            | J4B RPKM    | J4A RPKM    | Log <sub>2</sub> (fold change) | p-val       | Regulation |
|---------------|-------------|-------------|--------------------------------|-------------|------------|
| ghi-undef-366 | 0           | 5.792377678 | -                              | 0.005890658 | up         |
| ghi-undef-402 | 0           | 4.14178571  | -                              | 0.023840337 | up         |
| ghi-MIR164-4  | 0           | 8.514523918 | -                              | 0.028682569 | up         |
| ghi-undef-112 | 0           | 4.040286846 | -                              | 0.036246815 | up         |
| ghi-undef-247 | 6.57816189  | 559.2783486 | 6.409738156                    | 8.38E-07    | up         |
| ghi-undef-286 | 5.42595457  | 69.06595539 | 3.670025866                    | 0.033453193 | up         |
| ghi-undef-329 | 5.739396465 | 72.19740999 | 3.652976142                    | 0.018802719 | up         |
| ghi-MIR8674-3 | 22.10800128 | 274.3479711 | 3.633366401                    | 0.021313734 | up         |
| ghi-undef-274 | 0.397173405 | 4.845444977 | 3.608788234                    | 0.037878159 | up         |
| ghi-MIR7494-1 | 18.38174832 | 162.5480187 | 3.144520076                    | 0.049689517 | up         |

|                 |             |             |              |             |      |
|-----------------|-------------|-------------|--------------|-------------|------|
| ghi-undef-156   | 10.41542284 | 88.61197648 | 3.088780291  | 0.046509228 | up   |
| ghi-MIR7486-7   | 5.753338565 | 40.62567599 | 2.819920543  | 0.030575922 | up   |
| ghi-MIR8674-1   | 5.997600586 | 41.28574665 | 2.783186443  | 0.043863191 | up   |
| ghi-MIR7484-10  | 10.60513371 | 57.64723496 | 2.4424886    | 0.048856366 | up   |
| ghi-undef-259   | 12.12464746 | 58.40728532 | 2.268205533  | 0.038042593 | up   |
| ghi-MIR390-1    | 234.1766906 | 686.7774391 | 1.552245167  | 0.048809194 | up   |
| ghi-undef-222   | 335.1554302 | 23.51607675 | -3.833111012 | 2.61E-05    | down |
| ghi-undef-325   | 15.87436733 | 1.798336247 | -3.141964393 | 0.02789001  | down |
| ghi-MIR171_1-21 | 23.2157918  | 2.803835297 | -3.049632976 | 0.018237255 | down |
| ghi-MIR171_1-22 | 34.60582459 | 4.53128426  | -2.933022979 | 0.015997398 | down |
| ghi-MIR171_1-10 | 43.15720756 | 7.90932519  | -2.447975003 | 0.034086607 | down |
| ghi-MIR156-36   | 133.3452977 | 29.41250316 | -2.180665475 | 0.034494997 | down |
| ghi-MIR156-8    | 1167.816527 | 287.1873341 | -2.023749605 | 0.0111208   | down |
| ghi-undef-215   | 380.9918972 | 100.0102848 | -1.929611944 | 0.037517776 | down |
| ghi-undef-495   | 847.4236732 | 226.9985585 | -1.900400295 | 0.027456708 | down |
| ghi-MIR166-15   | 4129.406964 | 1134.188268 | -1.864274469 | 0.022129182 | down |

### Supplementary Table S3

MiRNA-mRNA target gene regulatory pairs.

| miRNA        | mRNA     | Gene             | Annotation                                        | miRNA regulation | mRNA regulation |
|--------------|----------|------------------|---------------------------------------------------|------------------|-----------------|
| ghi-MIR164-4 | gene2947 | LOC10789270<br>1 | ankyrin repeat domain-containing protein 13B-like | S_up             | F_up            |
| ghi-MIR164-4 | gene80   | LOC10789786<br>6 | uncharacterized LOC107897866                      | S_up             | F_up            |

|                 |           |              |                                                             |      |      |
|-----------------|-----------|--------------|-------------------------------------------------------------|------|------|
| ghi-MIR164-4    | gene83    | LOC107898061 | uncharacterized<br>LOC107898061                             | S_up | F_up |
| ghi-MIR7484-10  | gene66543 | LOC107932209 | mitogen-activated<br>protein kinase kinase 6-<br>like MAPKK | S_up | F_up |
| ghi-MIR7494-1   | gene34590 | LOC107897201 | mitochondrial arginine<br>transporter BAC2-like             | S_up | F_up |
| ghi-MIR8674-3   | gene17450 | LOC107956798 | uncharacterized<br>LOC107956798                             | S_up | F_up |
| ghi-undef-156   | gene9678  | LOC107946987 | agamous-like MADS-<br>box protein AGL19                     | S_up | F_up |
| ghi-undef-247   | gene57922 | LOC107924800 | E3 ubiquitin protein<br>ligase DRIP2-like                   | S_up | F_up |
| ghi-undef-366   | gene20742 | LOC107960817 | uncharacterized<br>LOC107960817                             | S_up | F_up |
| ghi-MIR156-36/8 | gene52076 | LOC107916259 | uncharacterized<br>protein At5g05190                        | F_up | S_up |
| ghi-MIR156-36/8 | gene69845 | LOC107935885 | probable WRKY<br>transcription factor 28                    | F_up | S_up |
| ghi-MIR156-8    | gene43509 | LOC107906859 | homeobox protein<br>knotted-1-like 3                        | F_up | S_up |
| ghi-MIR166-15   | gene33424 | LOC107895419 | protein ABSCISIC<br>ACID-INSENSITIVE 5-<br>like             | F_up | S_up |
| ghi-MIR166-15   | gene44631 | LOC107907684 | protein ABSCISIC<br>ACID-INSENSITIVE 5-<br>like             | F_up | S_up |
| ghi-MIR166-15   | gene62048 | LOC107927187 | respiratory burst<br>oxidase homolog<br>protein B-like      | F_up | S_up |
| ghi-MIR166-15   | gene62870 | LOC107928148 | protein ABSCISIC<br>ACID-INSENSITIVE 5-<br>like             | F_up | S_up |

|                    |               |                  |                                                                    |      |      |
|--------------------|---------------|------------------|--------------------------------------------------------------------|------|------|
| ghi-MIR171_1-10    | gene2731<br>8 | LOC10788866<br>1 | probable galactinol--<br>sucrose<br>galactosyltransferase 5        | F_up | S_up |
| ghi-MIR171_1-10/21 | gene5589      | LOC10792404<br>4 | scarecrow-like protein<br>6                                        | F_up | S_up |
| ghi-MIR171_1-10/21 | gene5846      | LOC10792617<br>0 | scarecrow-like protein<br>6                                        | F_up | S_up |
| ghi-MIR171_1-10/21 | gene7945      | LOC10794553<br>6 | scarecrow-like protein<br>6                                        | F_up | S_up |
| ghi-MIR171_1-22    | gene1263<br>9 | LOC10795046<br>9 | probable trehalose-<br>phosphate phosphatase<br>J                  | F_up | S_up |
| ghi-MIR171_1-22    | gene4783<br>7 | LOC10791205<br>6 | probable LRR receptor-<br>like serine/threonine-<br>protein kinase | F_up | S_up |
| ghi-MIR171_1-22    | gene4946<br>8 | LOC10791341<br>8 | SNF1-related protein<br>kinase regulatory<br>subunit gamma-1       | F_up | S_up |
| ghi-MIR171_1-22    | gene5862<br>3 | LOC10792347<br>3 | probable<br>polygalacturonase                                      | F_up | S_up |
| ghi-MIR171_1-22    | gene5991<br>4 | LOC10792523<br>8 | protein trichome<br>birefringence-like 38                          | F_up | S_up |
| ghi-undef-215      | gene2471<br>8 | LOC10796389<br>1 | uncharacterized<br>LOC107963891                                    | F_up | S_up |
| ghi-undef-215      | gene2861<br>6 | LOC10788968<br>7 | trafficking protein<br>particle complex<br>subunit 4-like          | F_up | S_up |
| ghi-undef-215      | gene5867<br>8 | LOC10792438<br>7 | transmembrane protein<br>120 homolog                               | F_up | S_up |
| ghi-undef-222      | gene1073<br>4 | LOC10794853<br>4 | uncharacterized<br>LOC107948534                                    | F_up | S_up |
| ghi-undef-222      | gene1090<br>2 | LOC10794863<br>8 | protochlorophyllide<br>reductase,<br>chloroplastic-like            | F_up | S_up |

|               |          |             |                   |      |      |
|---------------|----------|-------------|-------------------|------|------|
| ghi-undef-325 | gene4989 | LOC10791380 | probable inositol | F_up | S_up |
|               | 3        | 5           | transporter 2     |      |      |

#### Supplementary Table S4

Primers of qRT-PCR

| Gene            | Forward primer sequences   | Reverse primer sequences   |
|-----------------|----------------------------|----------------------------|
| U6              | CATTTCTCGATTGTGCGTC        | GGGGACATCCGATAAAATTGG      |
| 18S             | ATCAGCTCGCGTTGACTACGT      | ACACTTCACCGGACCATTCAAT     |
| ghi-MIR7484-10  | CCGCTTTGATCTAGTGTATGGAGACT |                            |
| MAPKK6          | AGAAACCGCCGAAGCCACTGA      | TGAAAGGCGCAGGATCCCGA       |
| ghi-undef-156   | CCTGGGATCTTCGAGAGAATTGA    |                            |
| AGL19           | GCGTGAAGAGTGTGGGATGCGA     | TCTTCTCTCCGGTGGGCCAA       |
| ghi-MIR171_1-22 | CCAGATATTGGTGCGGTTCAATT    |                            |
| TBL38           | GGCAAAATGGAGGGGAAAGAAA     | GAGTTGGGCACAGAAGCATGA<br>A |
| ghi-MIR156-8    | GGGCTCTCTATGCTTCTGTCATC    |                            |
| WRKY28          | AGCAGCACTGTTCCCGCCTT       | GCGCCGCCATCTGCATAAACA      |
